# Supplementary material for: Diagnostic Validation of a Comprehensive Targeted Panel for Broad Mutational and Biomarker Analysis in Solid Tumors
Source: MDPI journal article supplement (doi:10.3390/cancers14102457), 2022-05-16
Supplement: s1 [file s1]

**Table S1.** Reproducibility and accuracy of variant detection in the HD753 reference sample analyzed in 10 different runs (R4-R13). The variants in genes are given as the abbreviated change of amino acids. Variant allele frequencies (VAF) in percentages are provided for each run as well as the mean VAF and the standard deviation (SD). The last column provides the biological class of each variant according to the ComPerMed guidelines. Only the VAFs of the Pathogenic variants are provided by HorizonDx (HDx).

| Gene   | Change       | HDx VAF (%) |         |         |         |         |         |         |         |         |         |         | TSO500 VAF in 10 runs |     | Biological Class  |
|--------|--------------|-------------|---------|---------|---------|---------|---------|---------|---------|---------|---------|---------|-----------------------|-----|-------------------|
|        |              |             | VAF R04 | VAF R05 | VAF R06 | VAF R07 | VAF R08 | VAF R09 | VAF R10 | VAF R11 | VAF R12 | VAF R13 | mean (%)              | SD  |                   |
| BRAF   | V600E        | 18,2        | 17,7    | 16,3    | 16,0    | 12,3    | 15,3    | 14,2    | 13,1    | 19,1    | 16,2    | 19,3    | 15,9                  | 2,3 | Pathogenic        |
| PIK3CA | H1047R       | 16,7        | 18,0    | 20,5    | 18,1    | 18,4    | 22,0    | 18,1    | 14,2    | 17,7    | 15,5    | 15,3    | 17,8                  | 2,4 | Pathogenic        |
| BRCA2  | K1691Nfs*    | 5,6         | 4,4     | 7,8     | 4,0     | 7,7     | 6,5     | 9,2     | 2,7     | 4,7     | 7,7     | 6,3     | 6,1                   | 2,1 | Pathogenic        |
| EGFR   | A767_V769dup | 5,6         | 3,8     | 3,1     | 2,5     | 2,3     | 3,7     | 3,7     | 4,4     | 2,6     | 3,0     | 2,5     | 3,2                   | 0,7 | Pathogenic        |
| GNA11  | Q209L        | 5,6         | 5,3     | 3,8     | 7,3     | 4,9     | 3,3     | 5,5     | 5,9     | 4,2     | 4,5     | 4,2     | 4,9                   | 1,2 | Pathogenic        |
| KRAS   | G13D         | 5,6         | 3,8     | 2,9     | 6,2     | 3,7     | 5,0     | 5,6     | 6,8     | 4,8     | 2,9     | 6,5     | 4,8                   | 1,5 | Pathogenic        |
| PIK3CA | E545K        | 5,6         | 3,9     | 4,0     | 2,4     | 6,2     | 5,3     | 5,0     | 5,0     | 7,9     | 5,4     | 3,5     | 4,9                   | 1,5 | Pathogenic        |
| EGFR   | E746_A750del | 5,3         | 5,8     | 4,0     | 4,4     | 3,3     | 4,4     | 3,5     | 7,4     | 2,8     | 5,0     | 4,9     | 4,6                   | 1,3 | Pathogenic        |
| EGFR   | G719S        | 5,3         | 3,9     | 9,6     | 5,2     | 2,4     | 6,7     | 3,9     | 5,2     | 4,2     | 4,7     | 5,9     | 5,2                   | 2,0 | Pathogenic        |
| AKT1   | E17K         | 5,0         | 2,9     | 3,9     | 3,5     | 2,9     | 4,5     | 2,1     | 3,4     | 3,5     | 4,2     | 2,8     | 3,4                   | 0,7 | Pathogenic        |
| RNF43  | G659fs*      | np          | 22,6    | 21,2    | 19,1    | 22,6    | 27,3    | 20,0    | 21,0    | 19,0    | 18,4    | 22,1    | 21,3                  | 2,6 | Likely Pathogenic |
| TP53   | E171*        | np          | 13,4    | 9,7     | 14,4    | 11,5    | 11,3    | 12,2    | 13,3    | 11,6    | 11,6    | 13,4    | 12,2                  | 1,4 | Likely Pathogenic |
| NF2    | P275fs*      | np          | 12,4    | 8,2     | 11,4    | 10,3    | 12,3    | 12,8    | 11,2    | 8,6     | 10,4    | 11,3    | 10,9                  | 1,5 | Likely Pathogenic |
| ARID1A | D1850fs*     | np          | 8,7     | 12,1    | 11,6    | 10,8    | 11,0    | 9,4     | 11,6    | 10,2    | 11,5    | 8,8     | 10,6                  | 1,2 | Likely Pathogenic |
| HNF1A  | P379fs*      | np          | 9,1     | 11,4    | 11,2    | 11,0    | 6,5     | 10,1    | 9,8     | 14,0    | 9,0     | 12,9    | 10,5                  | 2,1 | Likely Pathogenic |
| NCOR1  | Q1833fs*     | np          | 9,6     | 6,0     | 12,6    | 13,1    | 14,1    | 10,2    | 9,7     | 9,8     | 8,9     | 9,3     | 10,3                  | 2,4 | Likely Pathogenic |
| ARID1A | P1115fs*     | np          | 9,5     | 10,6    | 8,7     | 10,8    | 9,4     | 11,4    | 8,9     | 11,2    | 7,5     | 8,2     | 9,6                   | 1,3 | Likely Pathogenic |
| CDKN2A | R58*         | np          | 10,6    | 10,1    | 11,3    | 8,0     | 5,6     | 12,4    | 9,8     | 7,9     | 9,7     | 9,2     | 9,5                   | 1,9 | Likely Pathogenic |
| NF1    | N2341fs*     | np          | 10,9    | 6,9     | 10,0    | 5,6     | 13,0    | 8,9     | 11,0    | 9,1     | 9,7     | 7,9     | 9,3                   | 2,1 | Likely Pathogenic |
| NF1    | Y628fs*      | np          | 6,4     | 7,0     | 12,4    | 11,0    | 12,2    | 8,9     | 10,0    | 6,6     | 8,6     | 9,7     | 9,3                   | 2,2 | Likely Pathogenic |
| KMT2A  | P773fs*      | np          | 7,0     | 10,0    | 8,3     | 8,1     | 10,2    | 10,5    | 8,7     | 9,2     | 9,6     | 7,1     | 8,9                   | 1,2 | Likely Pathogenic |
| FANCA  | E345fs*      | np          | 10,4    | 8,6     | 8,3     | 8,1     | 7,5     | 8,2     | 10,8    | 6,8     | 8,7     | 10,0    | 8,7                   | 1,3 | Likely Pathogenic |
| TET2   | S268*        | np          | 10,5    | 5,0     | 7,5     | 11,9    | 4,4     | 6,2     | 6,3     | 10,4    | 7,1     | 7,5     | 7,7                   | 2,5 | Likely Pathogenic |
| STK11  | F354L        | np          | 6,4     | 6,4     | 6,5     | 10,7    | 6,9     | 7,7     | 7,3     | 7,0     | 5,7     | 8,1     | 7,3                   | 1,4 | Likely Pathogenic |
| BCOR   | Q1208fs*     | np          | 10,6    | 4,4     | 6,1     | 4,8     | 6,8     | 6,5     | 6,1     | 6,8     | 9,7     | 7,0     | 6,9                   | 1,9 | Likely Pathogenic |
| CDKN2A | R24fs*       | np          | 9,4     | 7,0     | 5,5     | 7,8     | 3,1     | 5,9     | 11,0    | 9,2     | 4,9     | 4,9     | 6,9                   | 2,5 | Likely Pathogenic |
| TP53   | S241C        | np          | 6,6     | 6,1     | 6,9     | 7,5     | 6,6     | 4,6     | 5,5     | 9,2     | 6,3     | 6,2     | 6,5                   | 1,2 | Likely Pathogenic |
| TP53   | S241F        | np          | 5,5     | 6,1     | 6,9     | 7,5     | 6,6     | 4,6     | 5,5     | 9,2     | 6,3     | 6,2     | 6,4                   | 1,3 | Likely Pathogenic |
| CTNNB1 | S45del       | np          | 5,5     | 5,3     | 5,4     | 6,1     | 6,3     | 4,7     | 5,6     | 4,7     | 4,9     | 6,7     | 5,5                   | 0,7 | Likely Pathogenic |
| FBXW7  | S668fs*      | np          | 4,6     | 6,5     | 4,2     | 6,2     | 5,0     | 5,1     | 5,3     | 4,4     | 4,3     | 4,9     | 5,0                   | 0,8 | Likely Pathogenic |
| HNF1A  | P291fs*      | np          | 3,7     | 3,3     | 3,5     | 4,4     | 5,9     | 2,6     | 3,4     | 3,4     | 4,1     | 3,4     | 3,8                   | 0,9 | Likely Pathogenic |

del: deletion; dup: duplication; fs: frameshift; \*: termination; np: not provided

**Table S2 .** Analytical sensitivity of SNVs and indels in the retrospective and prospective FFPE samples. All unique gene variants are listed with their HGVS annotation. The variant type (SNV or indel), variant allele frequency (VAF) and coverages (Cov) are provided. Variants with a wide range of VAF and coverage were included.

| Gene   | variant                                   | variant type | VAF | Cov  |
|--------|-------------------------------------------|--------------|-----|------|
| BRAF   | c.1397G>A;p.(Gly466Glu)                   | SNV          | 34% | 214  |
| BRAF   | c.1406G>A;p.(Gly469Glu)                   | SNV          | 36% | 141  |
| BRAF   | c.1781A>G;p.(Asp594Gly)                   | SNV          | 17% | 378  |
| BRAF   | c.1799T>A; p.(Val600Glu)                  | SNV          | 41% | 370  |
| BRCA1  | c.1630C>T; p.(Gln544*)                    | SNV          | 90% | 252  |
| BRCA1  | c.2722G>T; p.(Glu908*)                    | SNV          | 46% | 439  |
| BRCA1  | c.3331_3334delCAAG; p.(Gln1111Asnfs*5)    | indel        | 58% | 208  |
| BRCA1  | c.5341-6_5349del;p.(?)                    | indel        | 34% | 217  |
| BRCA2  | c.4440T>G; p.(Tyr1480*)                   | SNV          | 97% | 87   |
| BRCA2  | c.5286T>A; p.(p.Tyr1762*)                 | SNV          | 58% | 72   |
| BRCA2  | c.5645C>A;p.(Ser1882*)                    | SNV          | 79% | 42   |
| CTNNB1 | c.110C>A; p.(Ser37Tyr)                    | SNV          | 19% | 588  |
| EGFR   | c.2237_2251del;p.(Glu746_Thr751delinsAla) | indel        | 55% | 678  |
| EGFR   | c.2310_2311ins;p.(Asp770_Asn771insGlyPhe) | indel        | 44% | 1050 |
| EGFR   | c.2369C>T;p.(Thr790Met)                   | SNV          | 85% | 7884 |
| EGFR   | c.2573T>G;p.(Leu858Arg)                   | SNV          | 92% | 7496 |
| ESR1   | c.1387T>C; p.(Ser463Pro)                  | SNV          | 23% | 1030 |
| ESR1   | c.1607T>A;p.(Leu536His)                   | SNV          | 82% | 39   |
| FBXW7  | c.1394G>A;p.(Arg465His)                   | SNV          | 10% | 231  |
| FGFR3  | c.742C>T; p.(Arg248Cys)                   | SNV          | 11% | 447  |
| GNAS   | c.2531G>A;p.(Arg844His)                   | SNV          | 11% | 462  |
| HRAS   | c.34G>A;p.(Gly12Ser)                      | SNV          | 6%  | 437  |
| HRAS   | c.34G>T;p.(Gly12Cys)                      | SNV          | 35% | 563  |
| IDH1   | c.395G>A;p.(Arg132His)                    | SNV          | 37% | 59   |
| KIT    | c.1727T>C;p.(Leu576Pro)                   | SNV          | 41% | 265  |
| KRAS   | c.34G>T;p.(Gly12Cys)                      | SNV          | 8%  | 172  |
| KRAS   | c.35G>A;p.(Gly12Asp)                      | SNV          | 49% | 246  |
| KRAS   | c.35G>C; p.(Gly12Ala)                     | SNV          | 17% | 356  |
| KRAS   | c.35G>T;p.(Gly12Val)                      | SNV          | 5%  | 56   |
| KRAS   | c.38G>A;p.(Gly13Asp)                      | SNV          | 6%  | 719  |
| KRAS   | c.182A>G;p.(Gln61Arg)                     | SNV          | 42% | 95   |
| KRAS   | c.183A>C;p.(Gln61His)                     | SNV          | 31% | 118  |
| NRAS   | c.38G>T;p.(Gly13Val)                      | SNV          | 12% | 1071 |
| NRAS   | c.183A>C; p.(Gln61His)                    | SNV          | 29% | 218  |
| PDGFRA | c.1698_1712del;p.(Ser566_Glu571delinsArg) | indel        | 49% | 904  |
| PIK3CA | c.263G>A; p.(Arg88Gln)                    | SNV          | 29% | 196  |
| PIK3CA | c.1624G>A; p.(Glu542Lys)                  | SNV          | 23% | 179  |
| PIK3CA | c.1633G>A;p.(Glu545Lys)                   | SNV          | 22% | 168  |
| PIK3CA | c.1634A>G;p.(Glu545Gly)                   | SNV          | 13% | 149  |
| PIK3CA | c.3140A>G;p.(His1047Arg)                  | SNV          | 38% | 26   |
| POLE   | c.847dupC; p.(Leu283Profs*5)              | indel        | 8%  | 462  |
| POLE   | c.857C>G; p.(Pro286Arg)                   | SNV          | 20% | 588  |
| POLE   | c.1231G>T; p.(Val411Leu)                  | SNV          | 35% | 694  |
| SMAD4  | c.1081C>T;p.(Arg361Cys)                   | SNV          | 24% | 525  |
| SMAD4  | c.1082G>A;p.(Arg361His)                   | SNV          | 14% | 157  |
| TERT   | c.-124C>T (C228T)                         | SNV          | 20% | 149  |
| TERT   | c.-146C>T (C250T)                         | SNV          | 31% | 212  |

del: deletion; fs: frameshift; ins: insertion; \*: termination

**Table S3 .** Analytical sensitivity and specificity of exon skipping and fusion gene detection analysed on RNA from 25 positive retrospective and 54 random prospective samples. The confirmed fusion events are listed in the left columns while the 5 structural variants in prospective samples that could not be checked due to the absence of an orthogonal assay are shown in the right columns.

| Confirmed structural variant | supp reads | Structural variant not confirmed | supp reads | comment         |
|------------------------------|------------|----------------------------------|------------|-----------------|
| EGFR vIII                    | 2144       | ERG::TTC3                        | 11         | del(21) unknown |
| MET ex14                     | 6885       | BRCA2::SLC7A1                    | 392        | del(13) unknown |
| CCDC6::RET                   | 4550       | SLC45A3::ETV1                    | 1982       | t(1;7) known    |
| CD74::ROS1                   | 250        | GLCCI1::EML4                     | 120        | t(2;7) unknown  |
| EML4::ALK var1               | 162        | NECTIN2::ALK                     | 16         | t(2;19) unknown |
| EML4::ALK var3a              | 24         |                                  |            |                 |
| ETV6::NTRK3                  | 1170       |                                  |            |                 |
| EWSR1::ERG                   | 3376       |                                  |            |                 |
| EWSR1::FLI1                  | 1963       |                                  |            |                 |
| EWSR1::NFATC2                | 7287       |                                  |            |                 |
| FGFR3::BAIAP2L1              | 1474       |                                  |            |                 |
| FGFR3::TACC3                 | 140        |                                  |            |                 |
| HIP1::ALK                    | 460        |                                  |            |                 |
| KIF5B::RET                   | 795        |                                  |            |                 |
| LMNA::NTRK1                  | 2082       |                                  |            |                 |
| NCOA4::RET                   | 1992       |                                  |            |                 |
| NPM1::ALK                    | 40         |                                  |            |                 |
| PAX3::FOXO1                  | 5593       |                                  |            |                 |
| PAX8::PPARG                  | 1419       |                                  |            |                 |
| SDC4::ROS1                   | 2162       |                                  |            |                 |
| SLC34A2::ROS1                | 272        |                                  |            |                 |
| <i>SLC45A3::BRAF</i>         | 1559       |                                  |            |                 |
| TMPRSS2::ERG                 | 1804       |                                  |            |                 |
| TPM3::NTRK1                  | 565        |                                  |            |                 |

**Table S4.** Limit-of-Detection for SNVs (16) and indel (8) detection. The samples were diluted to the indicated percentages (contribution to the mixed sample) in a second sample.

| Gene   | variant | contribution to the mixed sample |     |     |      |
|--------|---------|----------------------------------|-----|-----|------|
|        |         | 15%                              | 50% | 85% | 100% |
| EGFR   | T790M   | nt                               | 17% | 19% | 19%  |
| BRAF   | V600E   | 1%                               | 6%  | 31% | 75%  |
| PIK3CA | H1047R  | 3%                               | 5%  | 26% | 38%  |
| PIK3CA | N345K   | 8%                               | 31% | 48% | 70%  |
| TP53   | R175K   | 2%                               | 11% | 31% | 87%  |
| BRAF   | V600E   | 4%                               | 13% | 24% | 23%  |
| PIK3CA | H1047R  | 2%                               | 7%  | 10% | 11%  |
| GNAS   | R844H   | 1%                               | 5%  | 7%  | 9%   |
| EGFR   | L858R   | 47%                              | 79% | 90% | 92%  |
| EGFR   | T790M   | 44%                              | 73% | 83% | 85%  |

| Gene   | variant     | contribution to the mixed sample |     |     |      |
|--------|-------------|----------------------------------|-----|-----|------|
|        |             | 25%                              | 50% | 75% | 100% |
| PTEN   | R233*       | 1%                               | 1%  | 5%  | nt   |
| FBXW7  | R505H       | 12%                              | 15% | 21% | nt   |
| TET2   | Q705*       | 37%                              | 57% | 61% | nt   |
| KRAS   | G12V        | 5%                               | 5%  | nt  | nt   |
| GNAS   | R844H       | 4%                               | 8%  | nt  | nt   |
| PTEN   | Q245*       | 10%                              | 13% | 17% | nt   |
| BRCA1  | Q1111Nfs*   | nt                               | 18% | 31% | 58%  |
| EGFR   | ex19del15bp | 24%                              | 36% | 42% | nt   |
| BRCA2  | Q1782Tfs*   | 6%                               | 4%  | 7%  | 13%  |
| TET2   | Q1861Efs*   | 2%                               | 6%  | 8%  | 15%  |
| POLE   | L283Pfs*    | 3%                               | 4%  | 4%  | 8%   |
| ARID1A | G1850Tfs*   | 1%                               | 3%  | 6%  | 9%   |
| PTEN   | L267Rfs*    | 2%                               | 1%  | 14% | nt   |
| APC    | T1556Nfs*   | 2%                               | 5%  | 10% | nt   |

del: deletion; fs: frameshift; nt: not tested

**Table S5.** Limit of Detection for amplifications. Fold changes (FC) obtained for the genes with a known copy number variation (CNV) in retrospective samples analysed with the AmpliSeq assay on the original sample, and with the TSO500 assay on different contributions of that sample to the mixtures. FC's below the set threshold of 1.8 are indicated in italic.

| Sample | TC  | CNV   | AmpliSeq | Contribution to the mixture |            |            |
|--------|-----|-------|----------|-----------------------------|------------|------------|
|        |     |       |          | 75%                         | 50%        | 25%        |
| A1     | 50% | EGFR  | 13.0     | 12.0                        | 8.9        | 5.3        |
|        |     | ERBB2 | 5.1      | 4.7                         | 3.2        | 2.0        |
|        |     | CCND1 | np       | 2.8                         | 2.1        | <i>1.4</i> |
| A2     | 40% | FGF19 | np       | 3.2                         | 2.3        | <i>1.6</i> |
|        |     | FGF4  | np       | 3.1                         | 2.2        | <i>1.6</i> |
|        |     | FGF3  | np       | 3.0                         | 2.1        | <i>1.5</i> |
| A3     | 30% | EGFR  | 2.0      | 2.0                         | <i>1.7</i> | <i>1.3</i> |
| A4     | 60% | none  | nd       | nd                          | nd         | nd         |

nd: not detected; np: not present

**Table S6.** Limit of Detection of fusion gene analysis in 4 FFPE samples demonstrating that a 4-fold dilution (25% contribution) was still able to detect the fusion event.

| Sample | TC  | fusion       | Contribution to the mixture |      |     |
|--------|-----|--------------|-----------------------------|------|-----|
|        |     |              | 100%                        | 75%  | 25% |
| F1     | 70% | KIF5B::RET   | 2878                        | 1398 | 322 |
| F2     | 35% | EML4::ALK    | 427                         | 520  | 82  |
| F3     | 90% | SLC45A2::ERG | 126                         | 67   | 16  |
| F4     | 50% | none         | 0                           | 0    | 0   |

**Table S7.** Limit of detection of the SeraSeq RNA reference sample undiluted, and diluted 5- and 15-times. The number of supporting reads is indicated for both exon splicing and gene fusion events.

| fusion          | <i>undiluted</i> | <i>5x diluted</i> | <i>15x diluted</i> |
|-----------------|------------------|-------------------|--------------------|
| EGFR vIII       | 61               | 22                | 12                 |
| MET ex14 splice | 32               | <i>nd</i>         | <i>nd</i>          |
| SLC45A3-BRAF    | 54               | 14                | <i>nd</i>          |
| FGFR3-TACC3     | 174              | 39                | 16                 |
| FGFR3-BAIAP2L1  | 79               | 27                | 8                  |
| KIF5B-RET       | 94               | 19                | 8                  |
| NCOA4-RET       | 118              | 19                | 7                  |
| TMPRSS2-ERG     | 65               | 18                | 13                 |
| EML4-ALK        | 70               | 8                 | 5                  |
| CD74-ROS1       | 8                | <i>nd</i>         | <i>nd</i>          |
| ETV6-NTRK3      | 67               | 6                 | 8                  |
| LMNA-NTRK1      | 71               | 20                | 8                  |
| TPM3-NRRTK1     | 93               | 8                 | <i>nd</i>          |
| PAX8-PPARG      | 56               | 10                | 7                  |
| SLC34A2-ROS1    | 18               | <i>nd</i>         | <i>nd</i>          |
| EGFR-SEPT14     | 64               | 13                | <i>nd</i>          |

nd: not detected

**Table S8.** Accuracy of the TSO500 analysis on SeraSeq FFPE Tumor Fusion RNA Reference material v2. Both exon skipping events and gene fusions are listed as well as the number of supporting fusion reads (# supp reads) obtained by TSO500 analysis for each rearrangement.

| Rearrangement   | # supp reads |
|-----------------|--------------|
| EGFR vIII       | 61           |
| MET ex14 splice | 32           |
| SLC45A3-BRAF    | 54           |
| FGFR3-TACC3     | 174          |
| FGFR3-BAIAP2L1  | 79           |
| KIF5B-RET       | 94           |
| NCOA4-RET       | 118          |
| TMPRSS2-ERG     | 65           |
| EML4-ALK        | 70           |
| CD74-ROS1       | 8            |
| ETV6-NTRK3      | 67           |
| LMNA-NTRK1      | 71           |
| TPM3-NRTRK1     | 93           |
| PAX8-PPARG      | 56           |
| SLC34A2-ROS1    | 18           |
| EGFR-SEPT14     | 64           |
